# Supplementary material for: Assessing the Within-Field Heterogeneity Using Rapid-Eye NDVI Time Series Data
Source: MDPI journal article supplement (doi:10.3390/agriculture13051029), 2023-05-09

### **Supplementary Materials:**

**Figure S1.** NDVI values divided into quartiles (1-4). 1 (light yellow) corresponds to quartile 1 (lowest NDVI values) and 4 (dark green) to quartile 4 (highest NDVI values). Matching the year in the headline: (A): April, (B): May, (C): June, (D): April, (E): May, (F) June. Quartile classification of NDVI data showed that the northernmost area of the field had consistently lower NDVI values (Q1).

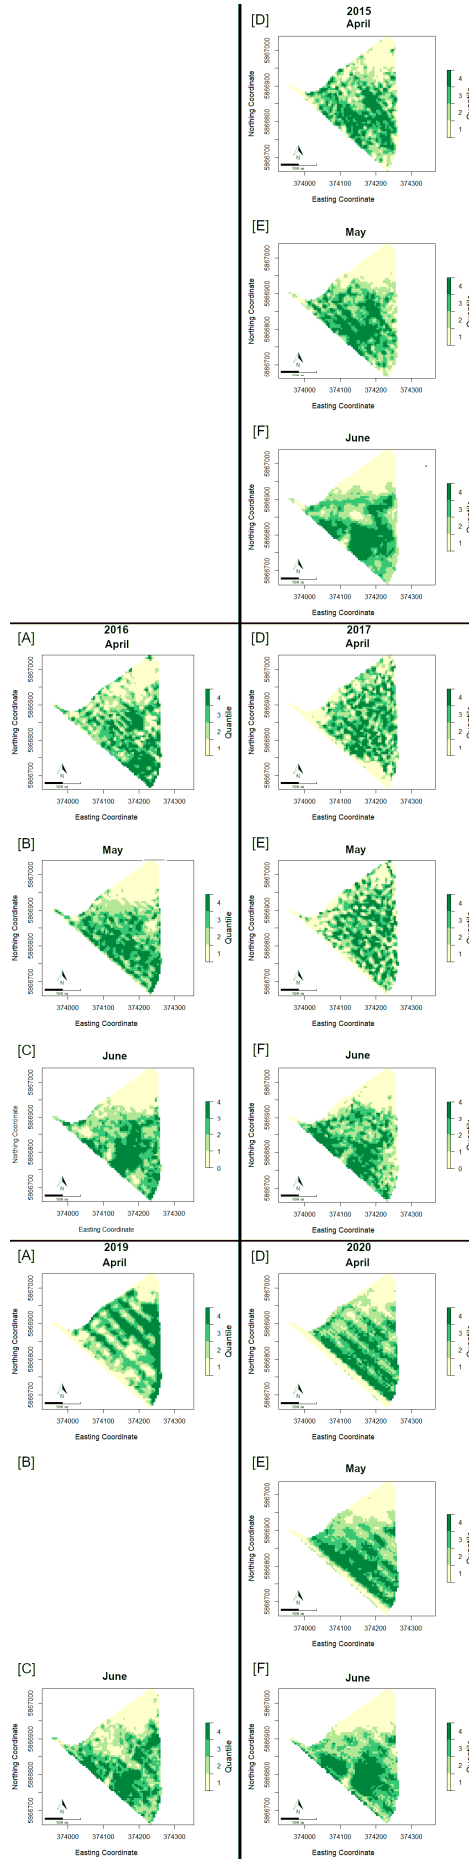

Supplement: s1 [file s1]
